# Supplementary material for: Prolonged Piezo1 Activation Induces Cardiac Arrhythmia
Source: MDPI journal article supplement (doi:10.3390/ijms24076720), 2023-04-04
Supplement: s1 [file s1]

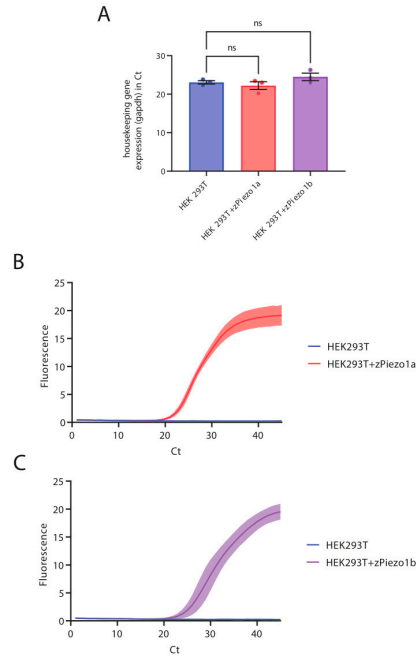

**Figure S1.** Expression of *piezo1a* and *piezo1b* in transfected HEK293T cells. (A) Housekeeping gene expression in non-transfected, (HEK293T) or transfected (HEK293T + zf Piezo1a, HEK293T + zf Piezo1b) cells. Data presented as individual values, mean  $\pm$  SEM.  $n=3$  for each condition. (B,C) Expression of *piezo1a* (B) and *piezo1b* (C) in transfected compared to non-transfected HEK293T cells. Data presented as average fluorescence curve and the filled area corresponding to the standard deviation.  $n=3$  for each condition. Housekeeping gene expression was statistically analysed using one-way ANOVA.
