# Supplementary material for: Prolonged Piezo1 Activation Induces Cardiac Arrhythmia
Source: Int J Mol Sci. 2023 Apr 4;24(7):6720. doi: 10.3390/ijms24076720 (PMC10094979; doi:10.3390/ijms24076720)
Supplement: Supplementary file 1 [file ijms-24-06720-s001.zip]

Archive with 5 entries (5 files):
- figure S1.pdf
- Video S1_heart_DMSO.m4v
- Video S2_heart_Yoda1.m4v
- Video S3-Optical mapping DMSO.m4v
- Video S4-Optical mapping Yoda1.m4v
